# Supplementary material for: Single-crystalline melem (C6N10H6) nanorods: a novel stable molecular crystal photocatalyst with modulated charge potentials and dynamics
Source: Royal Society of Chemistry journal article supplement (doi:10.1039/c9ta02556a), 2019-01-01
Supplement: c9ta02556a1.pdf [file c9ta02556a1.pdf]

# Single-crystalline Melem ( $C_6N_{10}H_6$ ) Nanorods: A Novel Stable Molecular Crystal Photocatalyst with Modulated Charge Potentials and Dynamics

Renbo Lei <sup>a</sup>, Bingsheng Du <sup>a</sup>, Xiaofang Lai <sup>a</sup>, Jing Wu <sup>a</sup>, Zhihua Zhang <sup>b</sup>, Shengwei Liu <sup>c,\*</sup>, Rong Wu <sup>d</sup>, Xin Li <sup>e</sup>, Bo Song <sup>f,\*</sup> and Jikang Jian <sup>a,\*</sup>

<sup>a</sup> School of Physics and Optoelectronic Engineering, Guangdong University of Technology, Guangzhou 510006, P. R. China

<sup>b</sup> Liaoning Key Materials Laboratory for Railway, School of Materials Science and Engineering, Dalian Jiao tong University, Dalian 116028, P. R. China

<sup>c</sup> School of Environmental Science and Engineering, Sun Yat-sen University, Guangzhou 510006, P. R. China

<sup>d</sup> Key Laboratory of Solid-state Physics and Devices, School of Physical Science and Technology, Xinjiang University, Urumqi 830046, P. R. China

<sup>e</sup> College of Forestry and Landscape Architecture, Key Laboratory of Energy Plants Resource and Utilization, Ministry of Agriculture, South China Agricultural University, Guangzhou 510642, P. R. China

<sup>f</sup> National Key Laboratory of Science and Technology on Advanced Composites in Special Environments, Harbin Institute of Technology, Harbin 150080, P. R. China

\*E-mail addresses: [liushw6@mail.sysu.edu.cn](mailto:liushw6@mail.sysu.edu.cn) (S. Liu); [songbo@hit.edu.cn](mailto:songbo@hit.edu.cn) (B. Song); [jianjiekang@gdut.edu.cn](mailto:jianjiekang@gdut.edu.cn) (J. Jian)

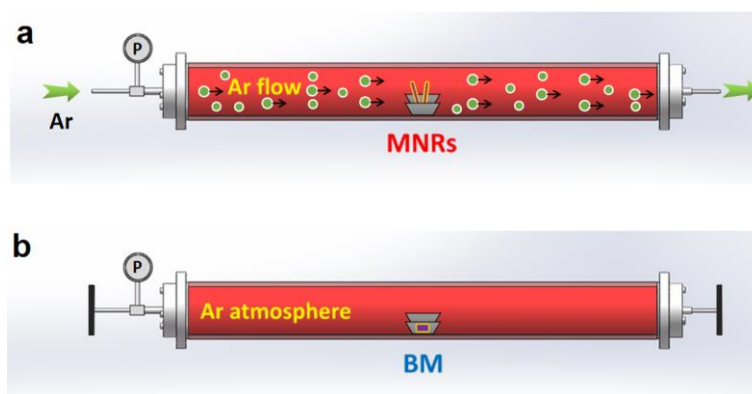

**Fig. S1** Schematic illustrations of synthetic routes for (a) MNRs and (b) BM.

**Table S1** Observed and calculated distances of crystalline planes of melem nanorods (MNRs). The calculation is based on the CIF file of melem reported in Ref .1.

| <b>Formula</b>     |             | $H_6N_7(NH_2)_3$  |                 |                 |
|--------------------|-------------|-------------------|-----------------|-----------------|
| <b>Space group</b> |             | $p2_1/c$ (no. 14) |                 |                 |
| <b>H K L</b>       | <b>DOBS</b> | <b>DCAL</b>       | <b>2TH.OBS</b>  | <b>2TH.CAL</b>  |
|                    | <b>(Å)</b>  | <b>(Å)</b>        | <b>(degree)</b> | <b>(degree)</b> |
| 1 0 0              | 7.3255      | 7.2887            | 12.072          | 12.133          |
| 0 1 1              | 7.1393      | 7.2336            | 12.388          | 12.226          |
| 0 0 2              | 6.6873      | 6.5909            | 13.229          | 13.423          |
| -1 0 2             | 5.3481      | 5.3701            | 16.562          | 16.494          |
| 1 1 1              | 4.8459      | 4.9077            | 18.292          | 18.061          |
| -1 1 2             | 4.5415      | 4.5628            | 19.53           | 19.439          |
| 1 1 2              | 4.0373      | 4.0043            | 21.998          | 22.182          |
| 1 2 0              | 3.738       | 3.7204            | 23.784          | 23.899          |
| 1 2 1              | 3.5343      | 3.501             | 25.177          | 25.421          |
| -2 -1 1            | 3.4049      | 3.3857            | 26.15           | 26.302          |
| 0 0 4              | 3.2821      | 3.2955            | 27.147          | 27.035          |
| 1 1 3              | 3.2361      | 3.2491            | 27.54           | 27.428          |
| -1 1 4             | 3.0035      | 3.0161            | 29.72           | 29.594          |
| -1 2 3             | 2.9353      | 2.971             | 30.427          | 30.054          |
| 1 0 4              | 2.8533      | 2.8257            | 31.324          | 31.638          |
| 1 2 3              | 2.716       | 2.7237            | 32.952          | 32.856          |
| -1 -3 1            | 2.6684      | 2.6612            | 33.557          | 33.65           |
| 1 3 1              | 2.5941      | 2.5962            | 34.547          | 34.52           |
| 1 2 4              | 2.3631      | 2.3658            | 38.048          | 38.003          |

(\* 2Theta < 40°)

**Fig. S2a** and **S3e** show the SEM images of melamine and g-C<sub>3</sub>N<sub>4</sub> synthesized at 550 °C for 2 h, respectively. **Fig. S3** also shows the SEM images of carbon nitride samples obtained at different temperatures. When the raw materials were annealed at 300 °C, massive crystals were obtained. **Fig. S3a** shows that melamine could be stable under 300 °C. **Fig. S3b** and **S3c** show that the original morphology of melamine gradually broken at a processing temperature of 350 °C, which then transformed into thick plates mixed with some rods at 400 °C. As the annealing temperature was increased to 500 °C, the nanorods disappeared and micro-sized particles with irregular shape were obtained (**Fig. S3d**).

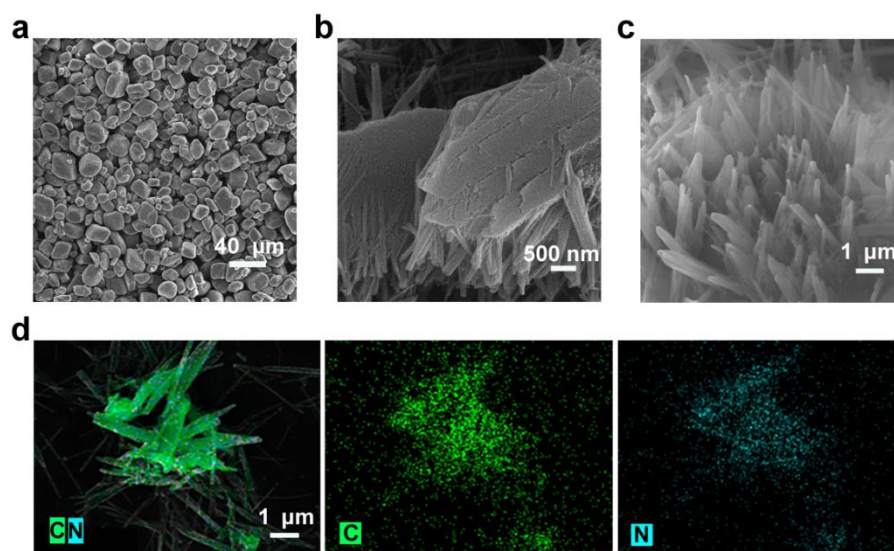

**Fig. S2** SEM images of (a) raw material melamine, (b) products synthesized at 450 °C for 10 min, and (c) products prepared at 450 °C for 120 min. (d) EDS elemental mapping images of MNRs.

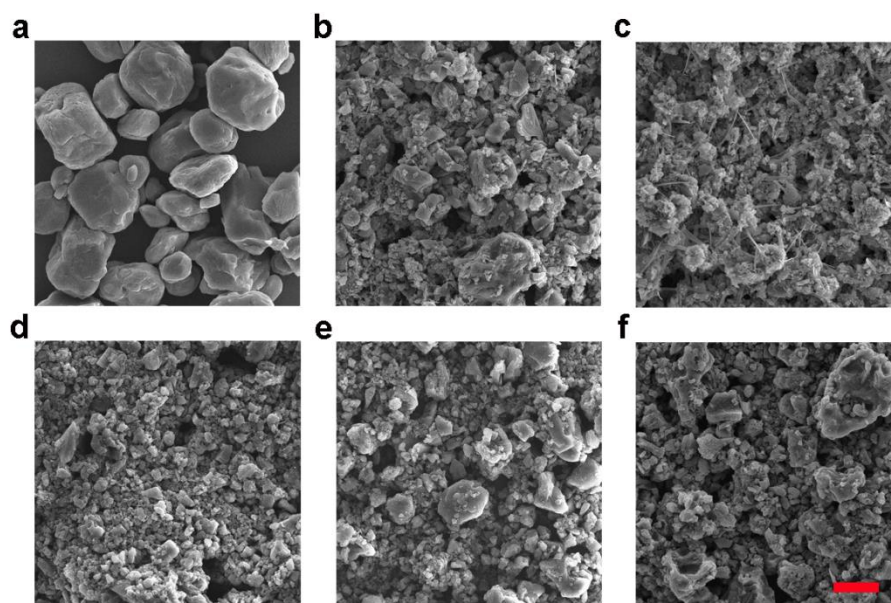

**Fig. S3** SEM images of carbon nitride samples obtained at different temperatures, (a) 300 °C, (b) 350 °C, (c) 400 °C, and (d) 500 °C. SEM images of (e) g-C<sub>3</sub>N<sub>4</sub> synthesized at 550 °C and (f) BM synthesized at 450 °C. The scale bar represents 10 μm.

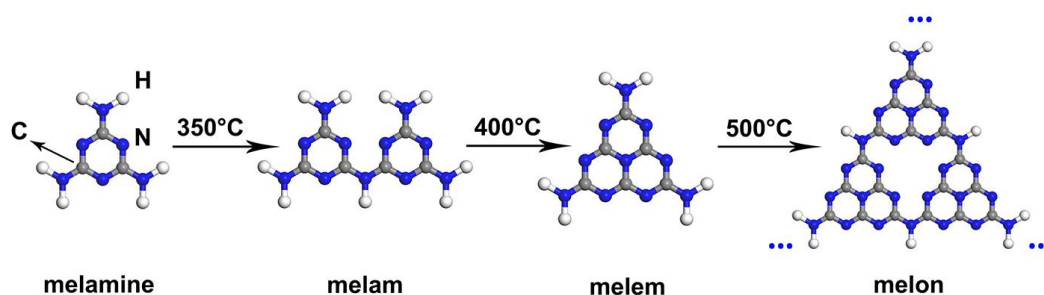

**Scheme S1** Formation of carbon nitrides during the thermal polymerization of melamine, proposed by Ref. 2.

The thermal polymerization of melamine is shown in **Scheme S1**,<sup>[2]</sup> indicating that as the pyrolysis temperature was gradually increased, the C–N rings became connected to yield melam, melem, and melon. However, C–N hexagonal ring remained undestroyed, exhibiting a higher stability.

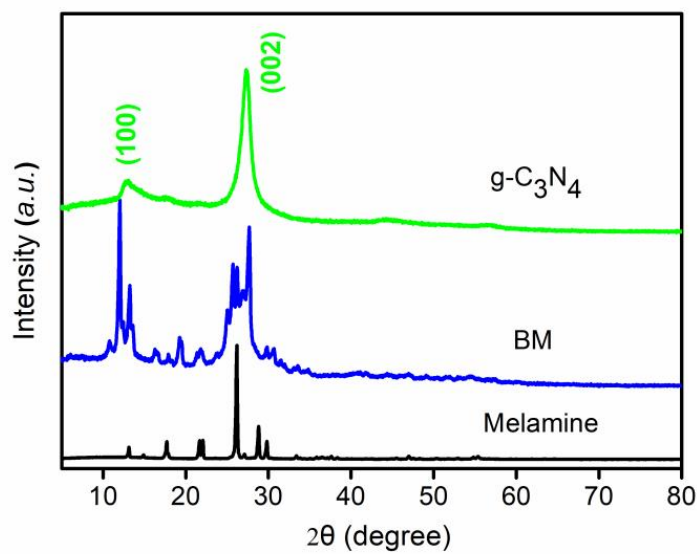

**Fig. S4** XRD patterns of the as-synthesized g-C<sub>3</sub>N<sub>4</sub>, BM, and the raw melamine.

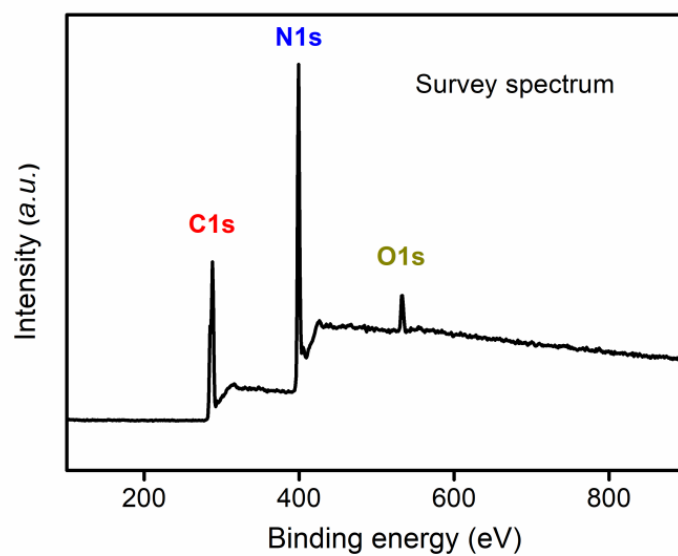

**Fig. S5** XPS survey spectrum of MNRs.

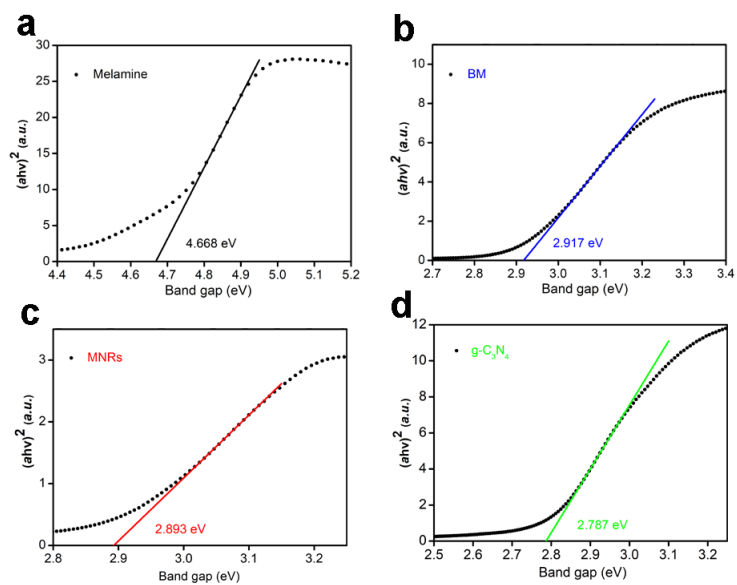

**Fig. S6** Fitted Tauc plots of: (a) melamine, (b) BM, (c) MNRs, and (d) g-C<sub>3</sub>N<sub>4</sub>.

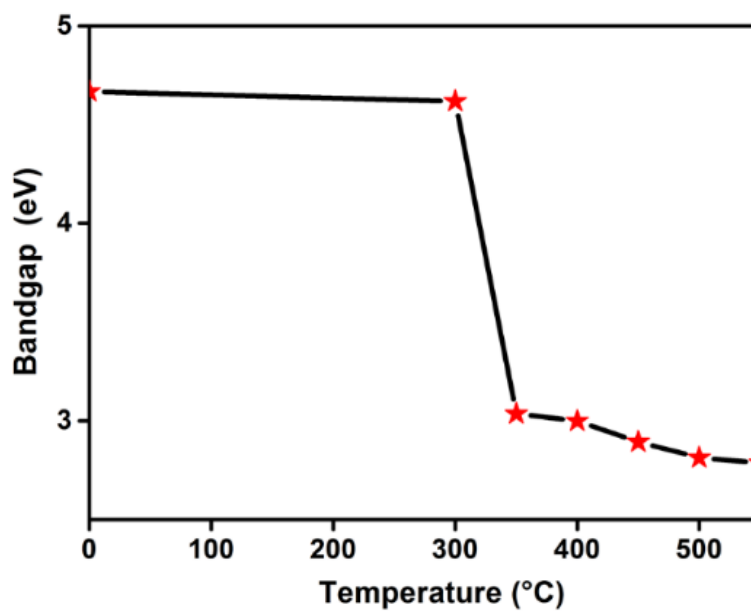

**Fig. S7** Temperature-dependent bandgap of carbon nitride products via the pyrolysis of melamine.

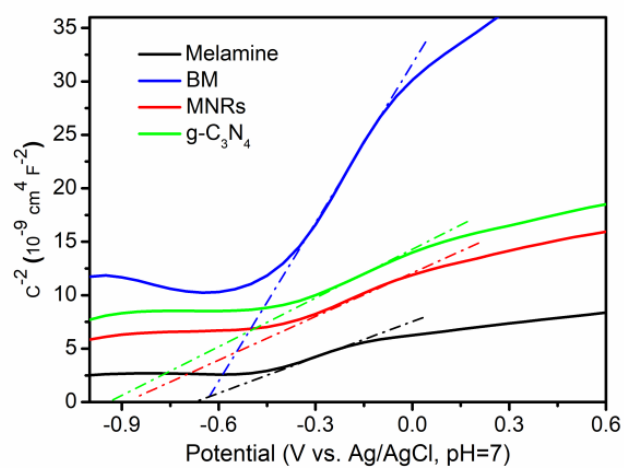

**Fig. S8** Mott–Schottky plots of melamine, BM, MNRs, and g-C<sub>3</sub>N<sub>4</sub>.

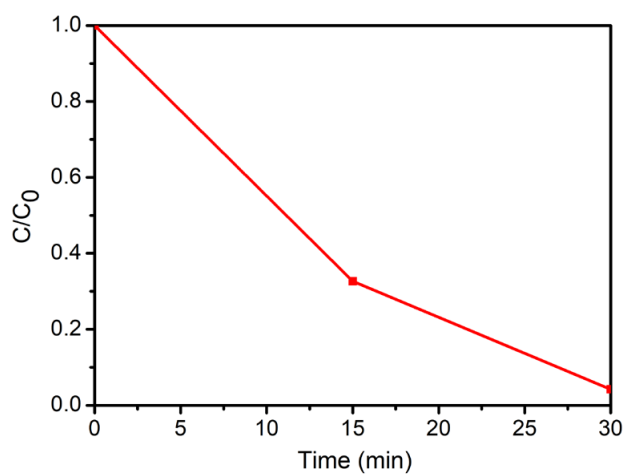

**Fig. S9** Time-dependent photocatalytic degradation of RhB on MNR photocatalysts under low-temperature environment (0–3 °C).

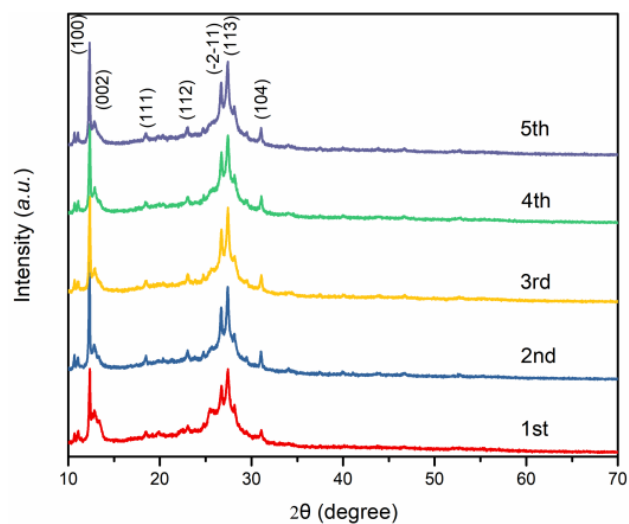

**Fig. S10** XRD patterns of MNRs after each cycling test of photocatalytic degradation of RhB.

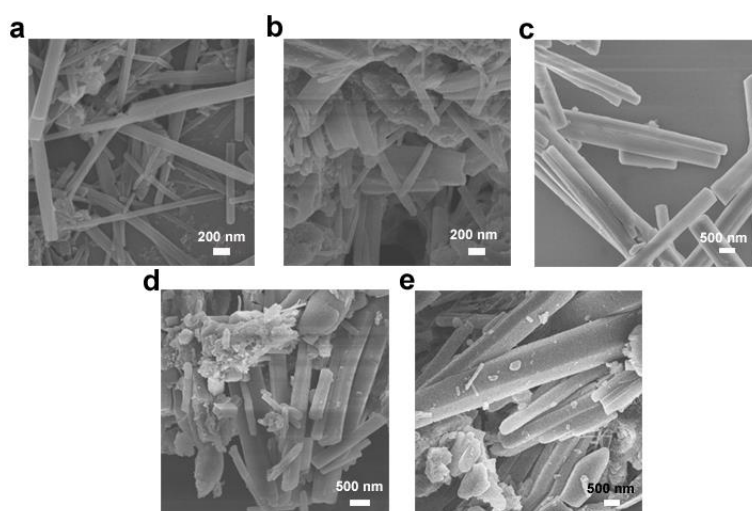

**Fig. S11** SEM images of MNRs after each cycling test of photocatalytic degradation of RhB. (a) first, (b) second, (c) third, (d) fourth, and (e) fifth cycle.



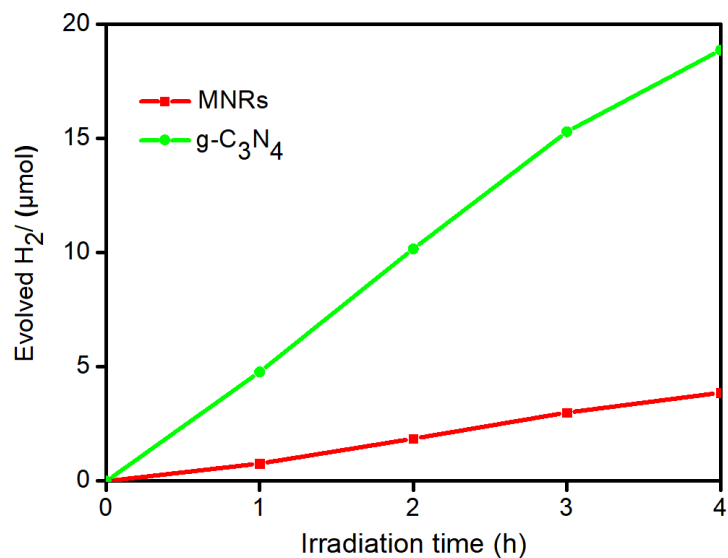

**Fig. S12** Time course of H<sub>2</sub> evolution from a 10 vol% aqueous triethanolamine solution by 0.1 wt% Pt-loaded MNRs and g-C<sub>3</sub>N<sub>4</sub> under visible-light irradiation.

### References

- [1] B. Jürgens, E. Irran, J. Senker, P. Kroll, H. Müller and W. Schnick, *J. Am. Chem. Soc.*, 2013, **125**, 10288-10300.
- [2] X.C. Wang, K. Maeda, A. Thomas, K. Takanabe, G. Xin, J. M. Carlsson, K. Domen and M. Antonietti, *Nat. Mater.*, 2009, **8**, 76-80.
